# Supplementary material for: Identification of Naturally Processed Epitope Region Using Artificial APC Expressing a Single HLA Class I Allotype and mRNA of HCMV pp65 Antigen Fragments
Source: MDPI journal article supplement (doi:10.3390/vaccines10050787), 2022-05-16
Supplement: s1 [file s1]

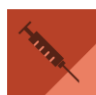

Supplementary Table S1. Donors HLA genotypes.

| Donor | A1   | A2   | B1   | B2   | C1   | C2   |
|-------|------|------|------|------|------|------|
| HD1   | 0201 | 3303 | 3501 | 4403 | 0401 | 1403 |
| HD2   | 0201 | 0206 | 1501 | 1511 | 0303 | 0702 |
| HD3   | 0201 | 1101 | 1501 | 4001 | 0304 | 0401 |
| HD4   | 0201 | 1101 | 1501 |      | 0401 | 0801 |
| HD5   | 0201 |      | 4801 | 5401 | 0304 | 0801 |
| HD6   | 3101 | 0206 | 1501 | 4601 | 0102 | 0303 |
| HD7   | 0201 | 2402 | 0702 | 5101 | 0702 | 1402 |
| HD8   | 0201 | 2402 | 0702 | 1501 | 0102 | 0702 |
| HD9   | 2402 | 3303 | 0702 | 3501 | 0702 | 0801 |

\*Allotypes presenting the pp65 antigen are marked in red.

Supplementary Table S2. PCR primer sequence for DNA template TAP.

| Primer             | Sequence(5' - 3')                                                      | Length(bp) |
|--------------------|------------------------------------------------------------------------|------------|
| CMVT7_F            | GTTGACATTGATTATTGACT                                                   | 20         |
| CMVT7_R            | GAATTCCATGGTGGCAAGCTTGGGTC                                             | 26         |
| T2A-TagBFP_F       | GAGAATCCCGGCCCTATGTCCGAGCTGATTAAGGA                                    | 35         |
| T2A-TagBFP_R       | AGTCAGATGCTCAAGTCAATTAAGCTTGTGCCCCA                                    | 35         |
| Beta globin pA_R   | ACAAAAAATTCCAACACACTATTGCAATGAAAA-TAAATTTCTTTATTAGCCAGAAGTCAGATGCTCAAG | 70         |
| pp65 whole_F       | GCCACCATGGAATTCATGGAGTCGCGCGGTCGCCG                                    | 35         |
| pp65 whole_R       | ACTTCCTCTGCCCTCACCTCGGTGCTTTTGGGCG                                     | 35         |
| pp65 fragment 1_F  | GCCACCATGGAATTCATGGAGTCGCGCGGTCGCCG                                    | 35         |
| pp65 fragment 1_R  | ACTTCCTCTGCCCTCGCGGTGGCATGGCGTCGAGT                                    | 35         |
| pp65 fragment 2_F  | GCCACCATGGAATTCATCCTGGTGTGCGCAGTACAC                                   | 35         |
| pp65 fragment 2_R  | ACTTCCTCTGCCCTCGCTGGGGATGTTTCAGCATCT                                   | 35         |
| pp65 fragment 3_F  | GCCACCATGGAATTCATCTATGTGTACGCGCTGCC                                    | 35         |
| pp65 fragment 3_R  | ACTTCCTCTGCCCTCGACGTCGGGCTCTTCCACT                                     | 35         |
| pp65 fragment 4_F  | GCCACCATGGAATTCCTGGCCTGGACGCGTCAGCA                                    | 35         |
| pp65 fragment 4_R  | ACTTCCTCTGCCCTCCACGTCCTCGCAGAAGGACT                                    | 35         |
| pp65 fragment 5_F  | GCCACCATGGAATTCGACCAGTACGTCAAGGTGTA                                    | 35         |
| pp65 fragment 5_R  | ACTTCCTCTGCCCTCGATGTGCGAGATCTTGCCCCG                                   | 35         |
| pp65 fragment 6_F  | GCCACCATGGAATTCCTGTCCCAAAAATATGATAAT                                   | 35         |
| pp65 fragment 6_R  | ACTTCCTCTGCCCTCCACGGGATCGTACTGACGCA                                    | 35         |
| pp65 fragment 7_F  | GCCACCATGGAATTCGAAGCGATACGCGAGACCGT                                    | 35         |
| pp65 fragment 7_R  | ACTTCCTCTGCCCTCCCAGACGTCGTCGTCGCCCT                                    | 35         |
| pp65 fragment 8_F  | GCCACCATGGAATTCGACCGGCACGACGAGGGTGC                                    | 35         |
| pp65 fragment 8_R  | ACTTCCTCTGCCCTCGCGGCCGCGTGTGATAACGC                                    | 35         |
| pp65 fragment 9_F  | GCCACCATGGAATTCCTCGGCGACGGCGTGCAC                                      | 35         |
| pp65 fragment 9_R  | ACTTCCTCTGCCCTCGTACTTCAGATTCTGACCCT                                    | 35         |
| pp65 fragment 10_F | GCCACCATGGAATTCCTGGCCCGCAACCTGGTGCC                                    | 35         |
| pp65 fragment 10_R | ACTTCCTCTGCCCTCACCTCGGTGCTTTTGGGCG                                     | 35         |
| T7-Kozak-F         | TAATACGACTCACTATAGGGAGACCCAAGCTTGCCACCATGGAATTC                        | 47         |

|                        |                                                                                  |    |
|------------------------|----------------------------------------------------------------------------------|----|
| Frag5-RPH mini-gene_F  | GCCACCATGGAATTCCTTCATGCGCCCCACGAGCGCAACGGCTTTAC-<br>GGTGTGTGTCTCCGAGGGCAGAGGAAGT | 75 |
| Frag5-VPS mini-gene_F  | GCCACCATGGAATTCGAGGACGTGCCCTCCGGCAAGCTCTTTATGCAC-<br>GTCACGCTGGGCGAGGGCAGAGGAAGT | 75 |
| Frag6-LMN mini-gene_F  | GCCACCATGGAATTCGGTAACCTGTTGATGAACGGGCAG-<br>CAAATCTTCCTGGAGGTACAAGAGGGCAGAGGAAGT | 75 |
| Frag8-TPR mini-gene_F  | GCCACCATGGAATTCGAGCGTAAGACGCCCCGCGTCAC-<br>CGGCGGCGGCGCCATGGCGAGCGAGGGCAGAGGAAGT | 75 |
| Frag9-NLV mini-gene_F  | GCCACCATGGAATTCCTGGCCCGCAACCTGGTGCCCATGGTGGCTAC-<br>GGTTCAGGGTCAGGAGGGCAGAGGAAGT | 75 |
| Frag10-RIF mini-gene_F | GCCACCATGGAATTCGACATCTACCGCATCTTCGCCGAATT-<br>GGAAGGCGTATGGCAGCCCGAGGGCAGAGGAAGT | 75 |
| HIV-GPG mini-gene_F    | GCCACCATGGAATTCGGAGTAGGAGGACCCGGCCATAAGGCAAGAG-<br>TTTTGGCTGAAGCAGAGGGCAGAGGAAGT | 75 |
| HIV-FLG mini-gene_F    | GCCACCATGGAATTCCAGGCTAATTTTTAGGGAAGATCTGGCCTTCC-<br>TACAAGGGAAGGGAGGGCAGAGGAAGT  | 75 |
